# Supplementary material
Source: PubMed Central journal article supplement (PMC6441634)
Supplement: NIHMS1516483-supplement-Supplemental_Figures.pdf [file NIHMS1516483-supplement-Supplemental_Figures.pdf]

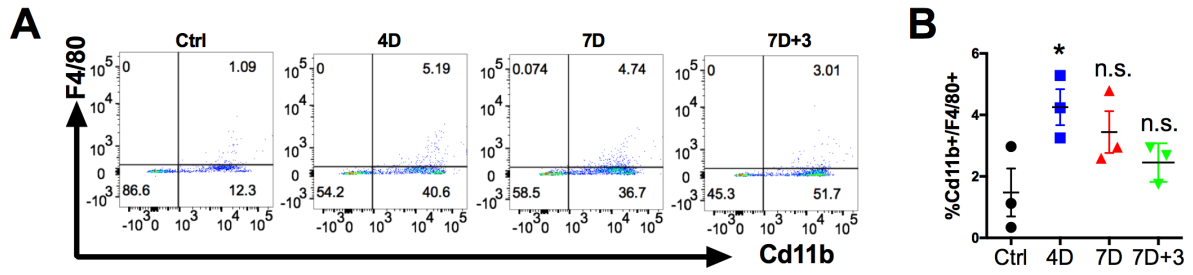

**Figure S1. Macrophage infiltration in DSS colitis.** (A) Representative flow cytometry dot plots and (B) quantification of F4/80<sup>+</sup>/Cd11b<sup>+</sup> cells in DSS colitis time course. \*p<0.05.

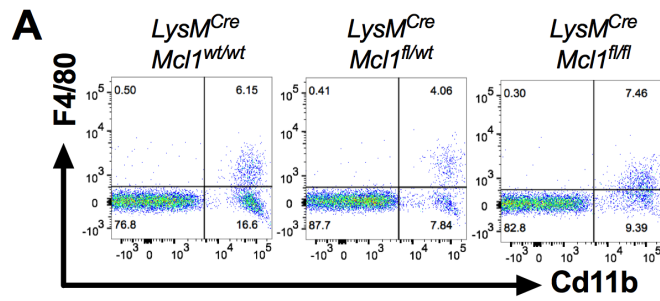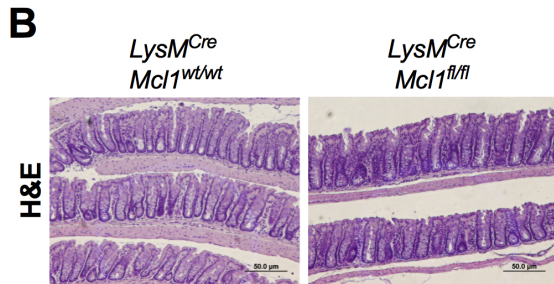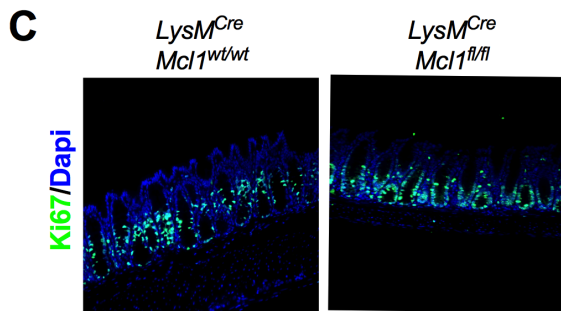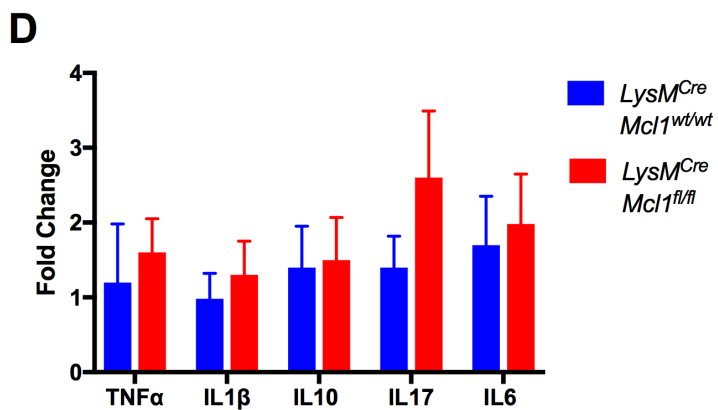

**Figure S2. Characterization of *LysM<sup>Cre</sup>;Mcl1<sup>fl/fl</sup>* mice.** (A) Representative flow cytometry dot plots of F4/80<sup>+</sup>/Cd11b<sup>+</sup> cells in peripheral blood. (B) Representative H&E staining and (C) Ki67 immunofluorescence from *LysM<sup>Cre</sup>;Mcl1<sup>wt/wt</sup>* and *LysM<sup>Cre</sup>;Mcl1<sup>fl/fl</sup>* mouse colon tissue. (D) Cytokine array analysis from colon tissue lysates from *LysM<sup>Cre</sup>;Mcl1<sup>wt/wt</sup>* (n=5) and *LysM<sup>Cre</sup>;Mcl1<sup>fl/fl</sup>* (n=7).

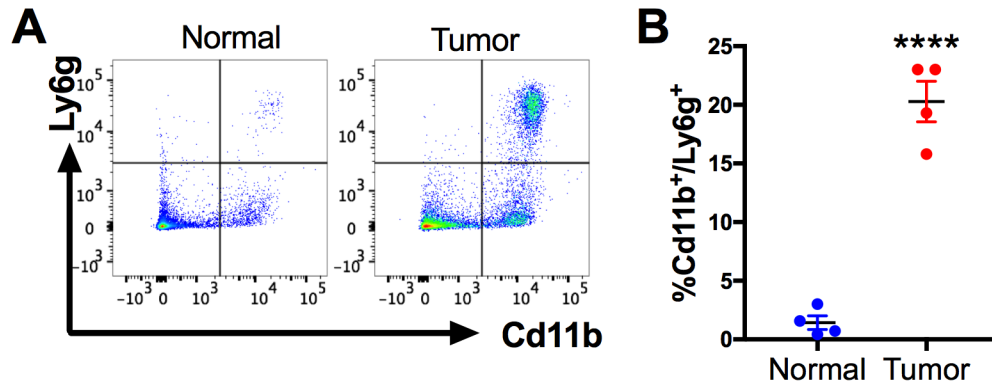

**Figure S3. Neutrophils are highly infiltrated in AOM/DSS colon tumors. (A)** Representative flow cytometry dot plots and **(B)** quantification of Ly6g<sup>+</sup>/Cd11b<sup>+</sup> cells in AOM/DSS colon tumors from WT mice. \*\*\*\*p<0.001. Statistical analysis performed by student's t test.

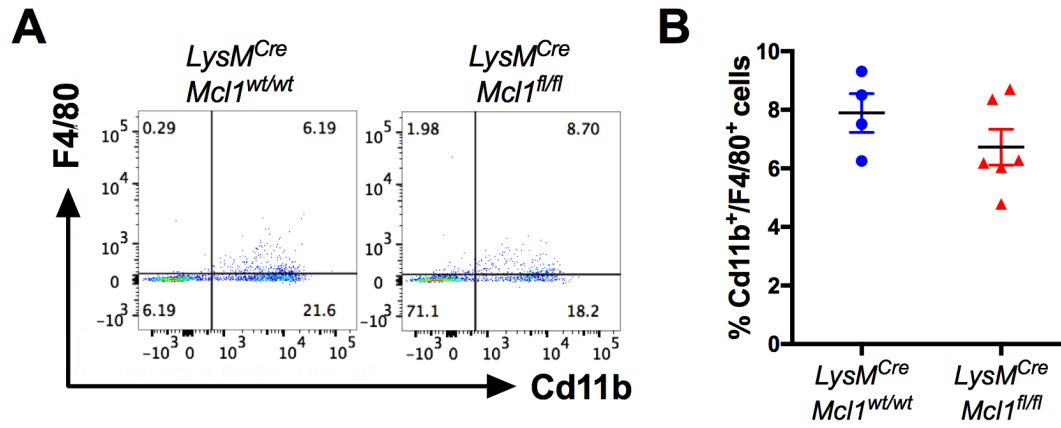

**Figure S4. Tumor infiltration of macrophages is unaltered in *LysM<sup>Cre</sup>;Mcl1<sup>fl/fl</sup>* mice. (A)** Representative flow cytometry dot plots and **(B)** quantification of F4/80<sup>+</sup>/Cd11b<sup>+</sup> cells in colon tumors from *LysM<sup>Cre</sup>;Mcl1<sup>wt/wt</sup>* and *LysM<sup>Cre</sup>;Mcl1<sup>fl/fl</sup>* mice. Statistical analysis performed by student's t test.

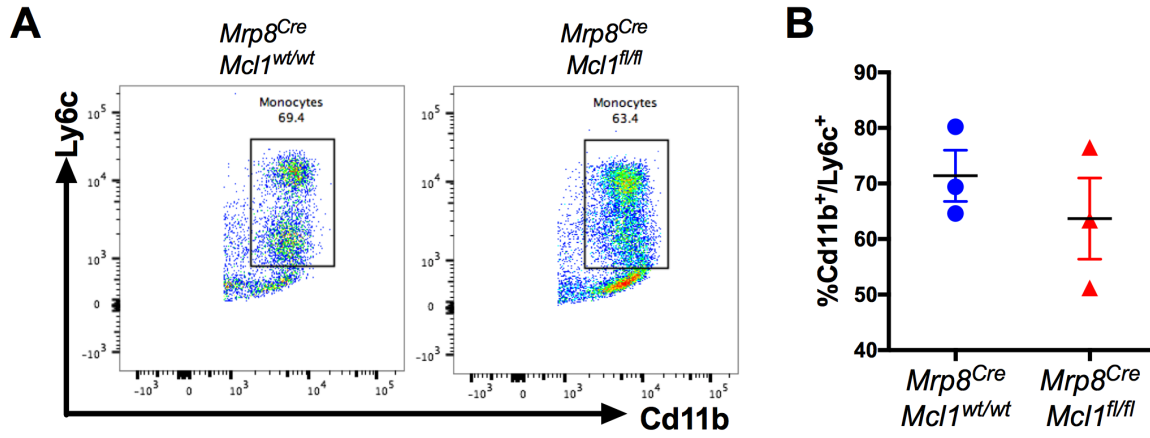

**Figure S5. Monocytes are unchanged in *Mrp8-Cre/Mcl1<sup>fl/fl</sup>* mice.** (A) Representative flow cytometry dot plots and (B) quantification of Ly6c<sup>+</sup>/Cd11b<sup>+</sup> cells as a percentage of total myeloid cells from *Mrp8<sup>Cre</sup>;Mcl1<sup>wt/wt</sup>* and *Mrp8<sup>Cre</sup>;Mcl1<sup>fl/fl</sup>* mice. Statistical analysis performed by student's t test.

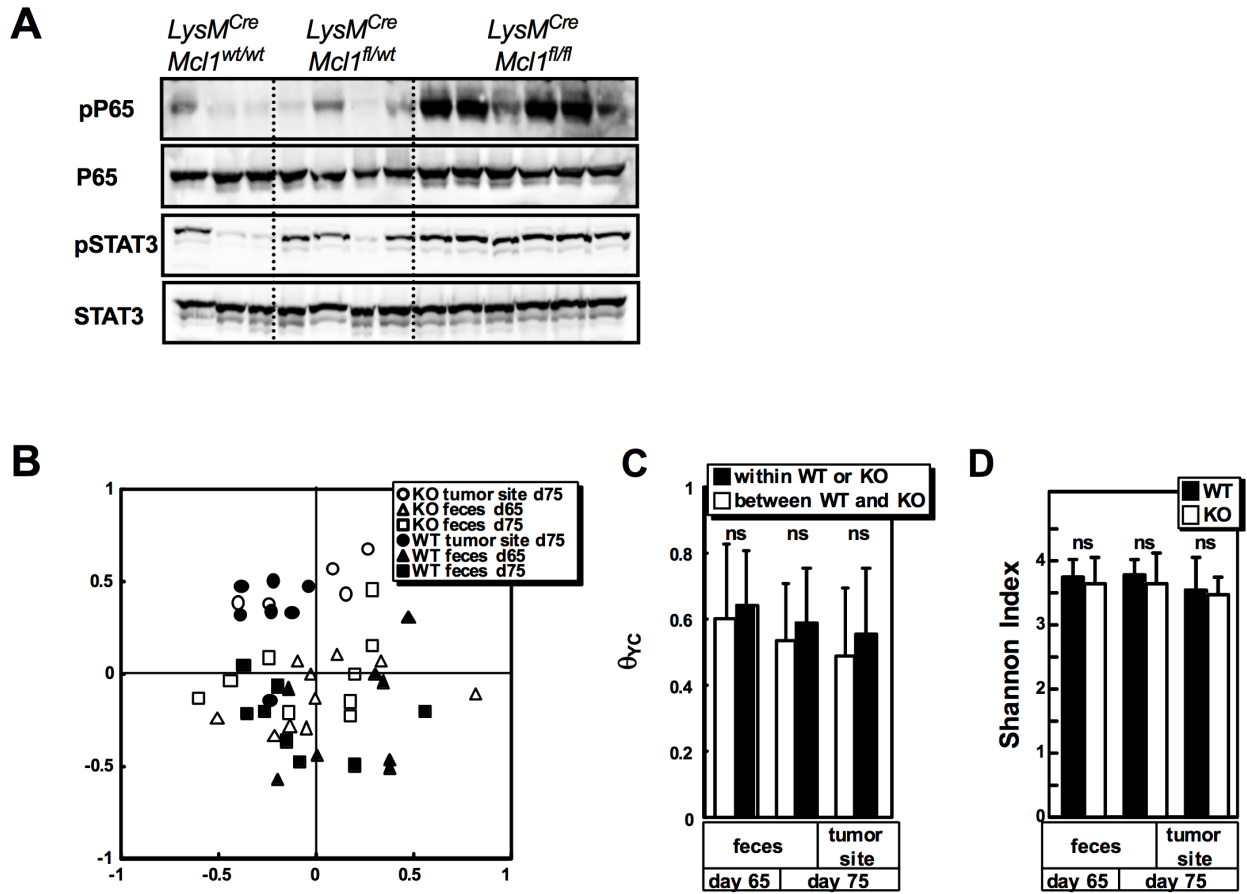

**Figure S6. PMN depletion increases microbiota-dependent inflammatory responses.** (A) Western blot analysis of colon tumors from *LysM<sup>Cre</sup>;Mcl1<sup>wt/wt</sup>*, *LysM<sup>Cre</sup>;Mcl1<sup>fl/wt</sup>*, and *LysM<sup>Cre</sup>;Mcl1<sup>fl/fl</sup>* mice. Statistical analysis was performed with student's t-test. (B) NMDS plot based on  $\theta_{YC}$  of *LysM<sup>Cre</sup>;Mcl1<sup>wt/wt</sup>* (WT) and *LysM<sup>Cre</sup>;Mcl1<sup>fl/fl</sup>* (KO) (C)  $\beta$ -diversity index,  $\theta_{YC}$  of WT and KO mice. (D) Shannon's  $\alpha$ -diversity index of WT and KO mice.

**A**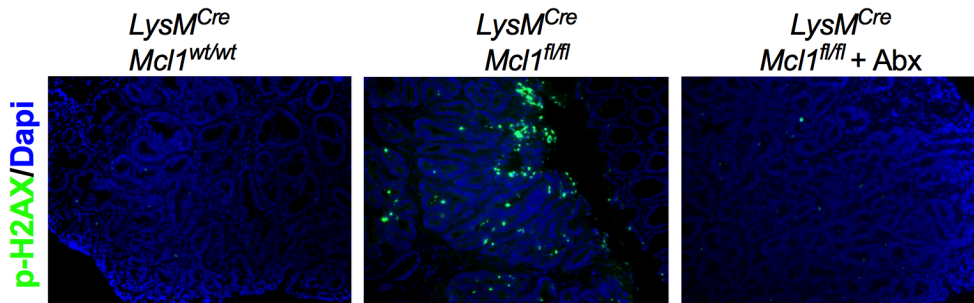**B**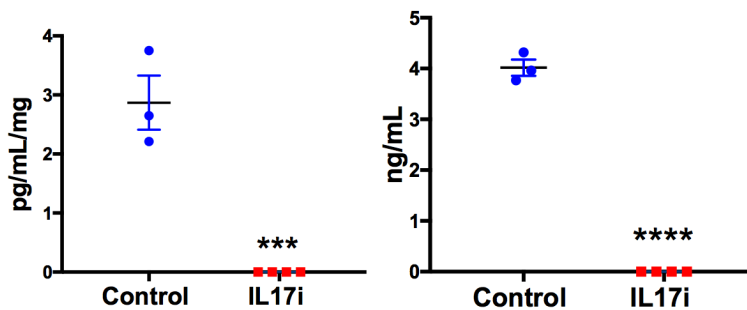**C**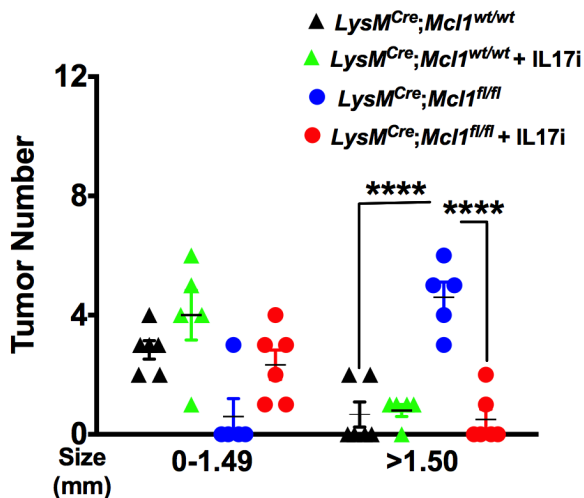

**Figure S7. Bacteria and IL-17 are important for neutrophil-deficient colon tumorigenesis.**

(A) Representative images of immunofluorescence staining of p-H2AX in *LysM<sup>Cre</sup>;Mcl1<sup>wt/wt</sup>* and *LysM<sup>Cre</sup>;Mcl1<sup>fl/fl</sup>* colon tumors treated with Ctrl or antibiotics (Abx). (B) ELISA analysis of IL-17 protein in colon tissue explants and (C) serum of mice treated with Ctrl IgG or IL-17 IgG (IL17i). \*\*\*\* p < 0.001. (D) Tumor size of colon tumors in *LysM<sup>Cre</sup>;Mcl1<sup>wt/wt</sup>* and *LysM<sup>Cre</sup>;Mcl1<sup>fl/fl</sup>* treated with Ctrl IgG or IL-17 IgG (IL17i). \*\*\*\* p < 0.0001.

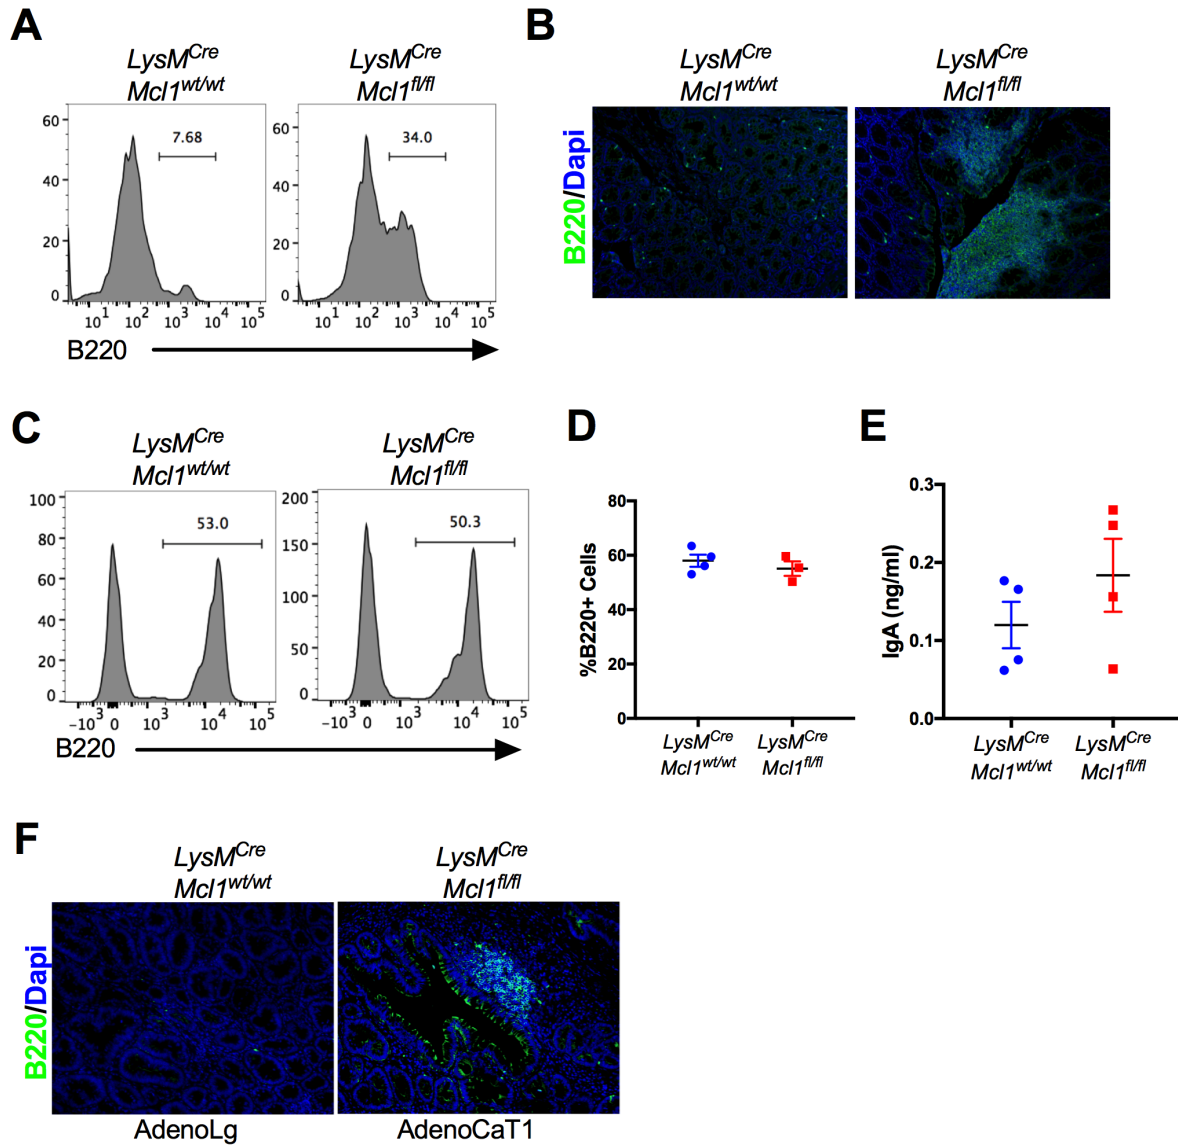

**Figure S8. Increased B-cells in PMN-deficient colon tumors.** (A) Flow cytometric analysis and (B) representative images of B220 staining of colon tumor tissue from *LysM<sup>Cre</sup>;Mcl1<sup>wt/wt</sup>* and *LysM<sup>Cre</sup>;Mcl1<sup>fl/fl</sup>* mice. (C) Flow cytometric analysis of B220 staining and (D) quantification of peripheral blood B-cells. (E) IgA ELISA analysis from feces of *LysM<sup>Cre</sup>;Mcl1<sup>wt/wt</sup>* and *LysM<sup>Cre</sup>;Mcl1<sup>fl/fl</sup>* mice. (F) Representative immunofluorescence of B220 staining from WT tumor tissue and invasive adenocarcinoma tissue from *LysM<sup>Cre</sup>;Mcl1<sup>fl/fl</sup>* mouse.



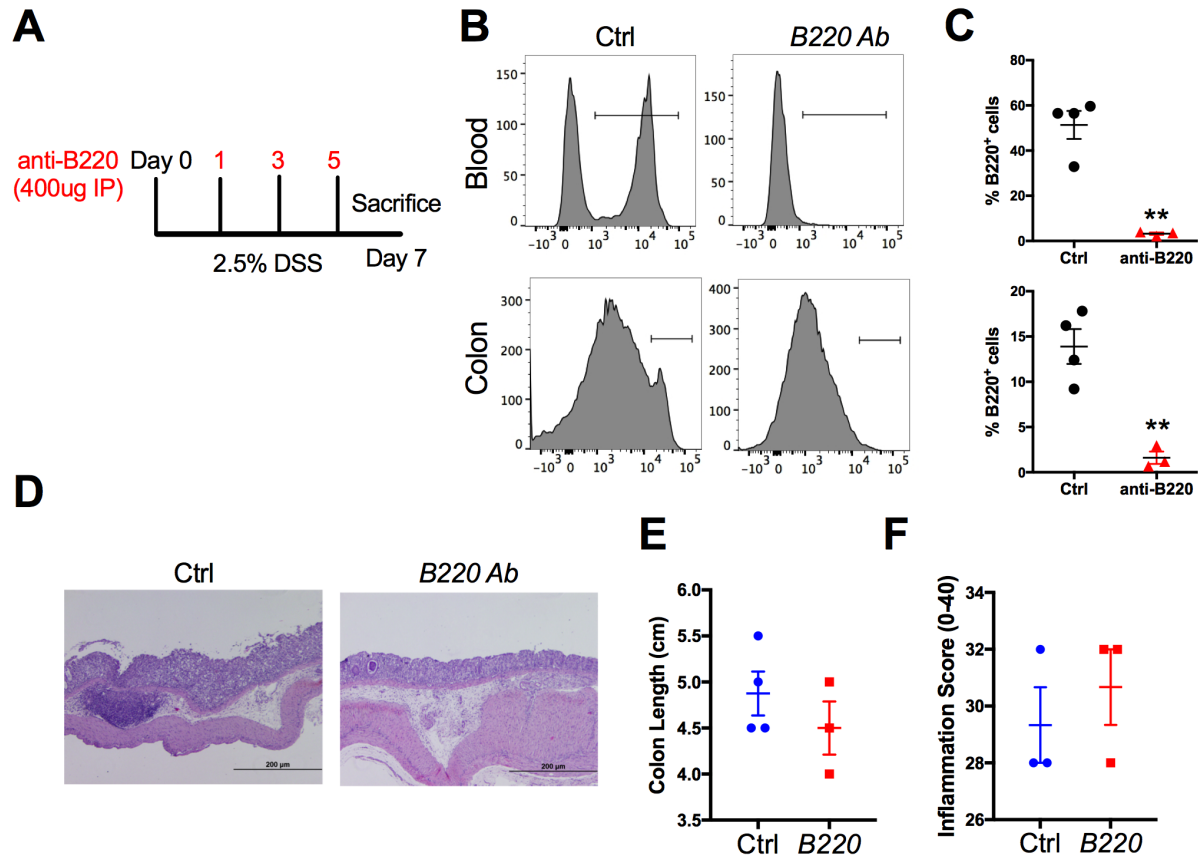

**Figure S9. B-cell depletion does not exacerbate DSS colitis.** (A) Schematic of 2.5% DSS treatment and anti-B220 injections (400ug/mouse I.P.) on days 1, 3, and 5. (B) Representative flow cytometric analysis of B220 staining in peripheral blood and colon tissue and (C) quantification B-cells of Ctrl and anti-B220 treated animals. (D) Representative H&E histologic analysis (E) colon length and (F) total inflammation score of treated mice. Statistical analysis performed by student's t test.

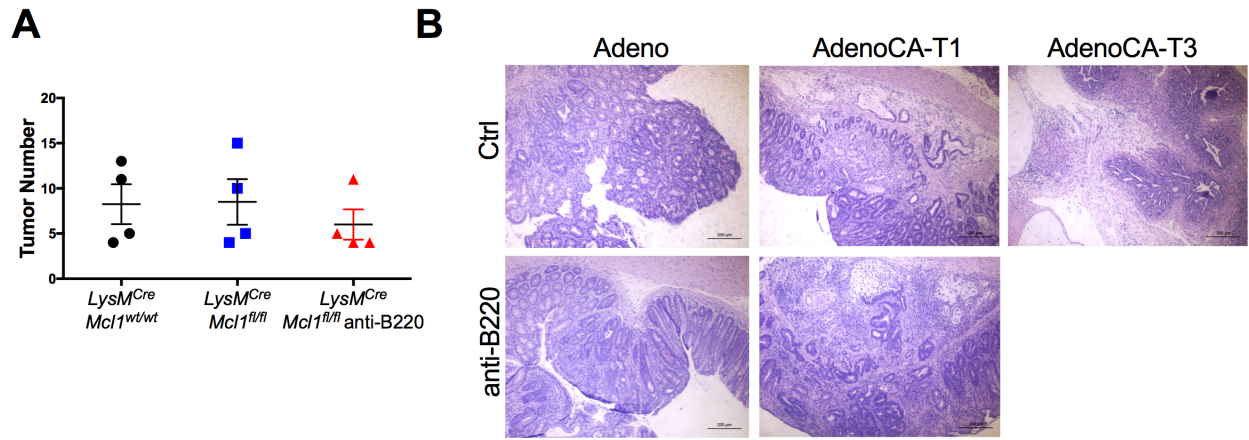

**Figure S10. B-cell depletion reduces PMN-deficient tumor progression. (A)** Tumor number and **(B)** representative histologic analysis indicated tumor stage from Ctrl and anti-B220 treated *LysM<sup>Cre</sup>; Mcl1<sup>fl/fl</sup>* mice. Statistical analysis was performed by one-way ANOVA followed by Tukey's multiple comparisons test.
