# Supplementary material
Source: PubMed Central journal article supplement (PMC6441634)
Supplement: NIHMS1516483-supplement-Table_S1.pdf [file NIHMS1516483-supplement-Table_S1.pdf]

Table S1: Primers

| Primer name                   | Primer sequence                                      |
|-------------------------------|------------------------------------------------------|
| <i>Tnf<math>\alpha</math></i> | F- AGGGTCTGGGCCATAGAACT<br>R- CCACCACGCTCTTCTGTCTAC  |
| <i>Il6</i>                    | F- ACCAGAGGAAATTTCAATAGGC<br>R- TGATGCACTTGCAGAAAACA |
| <i>Il17</i>                   | F- TGAGCTTCCCAGATCACAGA<br>R- TCCAGAAGGCCCTCAGACTA   |
| <i>Il22</i>                   | F- TCGCCTTGATCTCTCCACTC<br>R- GCTCAGCTCCTGTCACATCA   |
